# Supplementary material for: 3D Bioprinted Human Cortical Neural Constructs Derived from Induced Pluripotent Stem Cells
Source: MDPI journal article supplement (doi:10.3390/jcm8101595), 2019-10-02
Supplement: s1 [file s1]

## Supplementary Information

### **3D bioprinted functional human neural constructs derived from induced Pluripotent Stem Cells**

Federico Salaris<sup>1,2</sup>, Cristina Colosi<sup>1</sup>, Carlo Brighi<sup>1</sup>, Alessandro Soloperto<sup>1</sup>, Valeria de Turreis<sup>1</sup>,  
Maria Cristina Benedetti<sup>2</sup>, Silvia Ghirga<sup>1</sup>, Maria Rosito<sup>1</sup>, Silvia Di Angelantonio<sup>1,3,\*</sup>,  
Alessandro Rosa<sup>1,2,\*</sup>

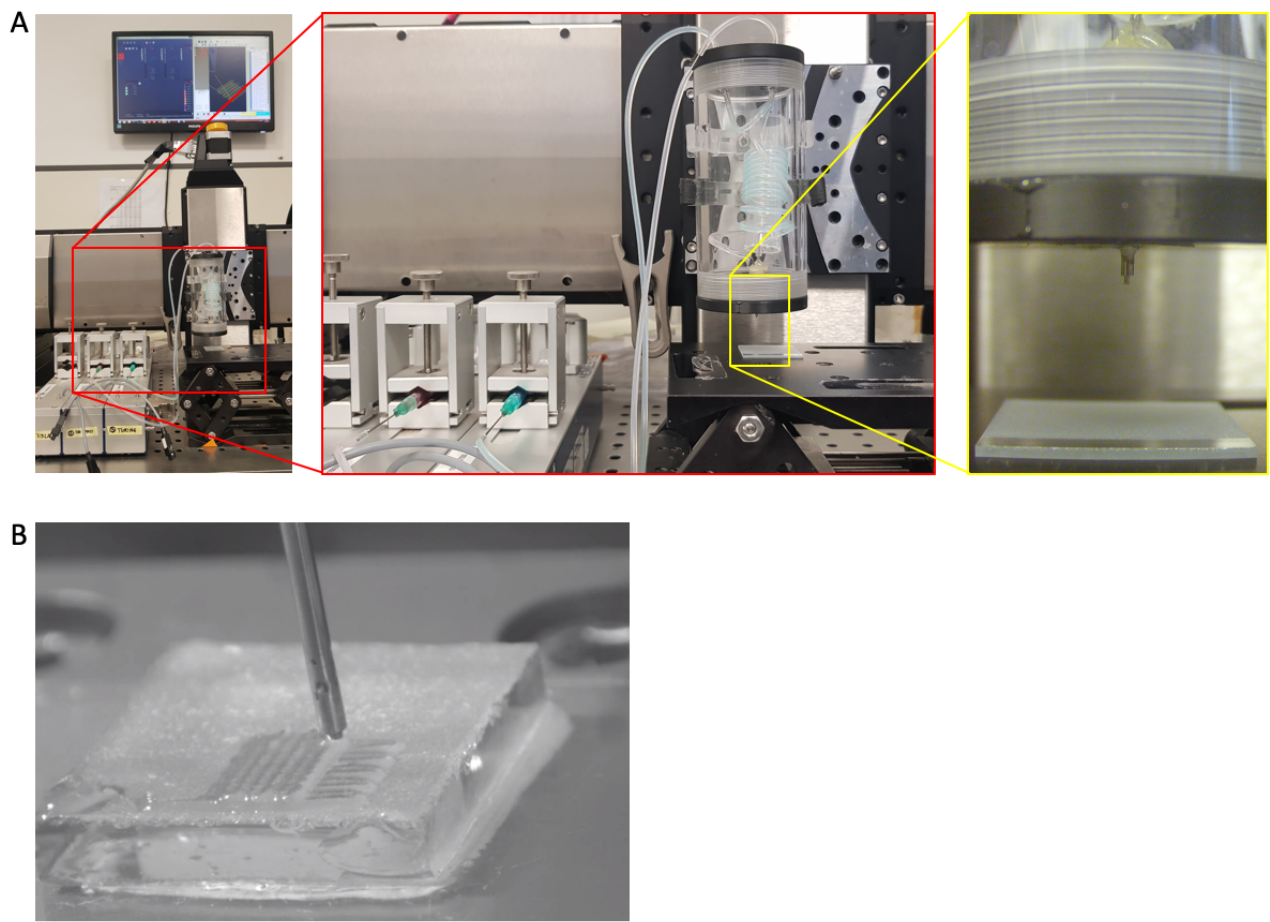

**Figure S1. The custom bioprinter used in this work**  
(A) Photograph of the 3D-bioprinter machine. Close-up pictures show increasing magnifications of the extrusion system. (B) Picture of the construct during the printing process.

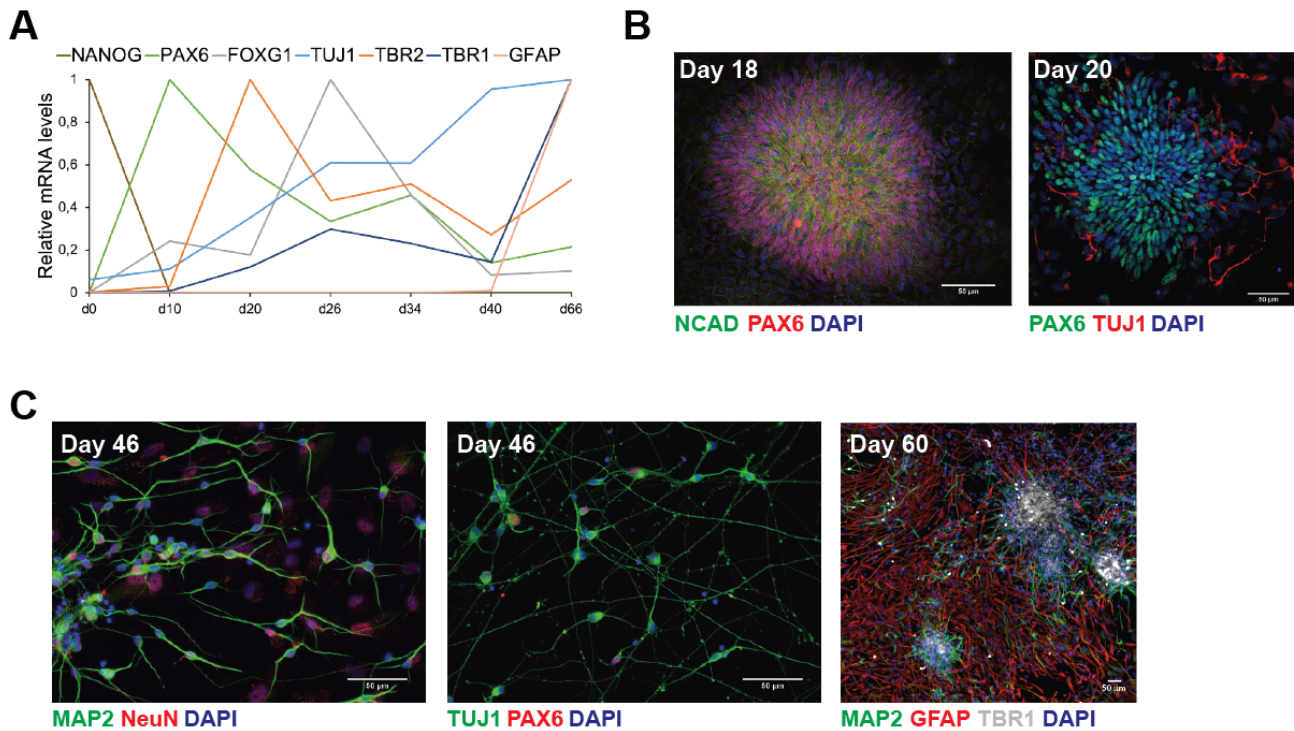

### Figure S2. Neural differentiation of human iPSCs

(A) Real-time qRT-PCR analysis of the expression of the indicated markers during iPSC differentiation. Targets were analyzed by real-time qRT-PCR with SYBR Green Power-UP (Thermo Fisher Scientific) in a ViiA 7 Real-Time PCR System (Applied Biosystems). The internal control used was the housekeeping gene ATP5O. Primers sequences are reported in Table S1. (B) Immunostaining showing expression of the indicated neural genes during the NPC formation stage of the differentiation protocol. Antibodies: anti-PAX6 (1:50), anti-NCAD (1:100), anti-TUJ1 (1:1000), anti-MAP2 (1:2000), anti-NeuN (1:50), anti-GFAP (1:500), anti-TBR1 (1:150). (C) Immunostaining showing expression of neuronal and astrocyte markers during the neuronal maturation stage of the differentiation protocol.

- Alginate-lyase

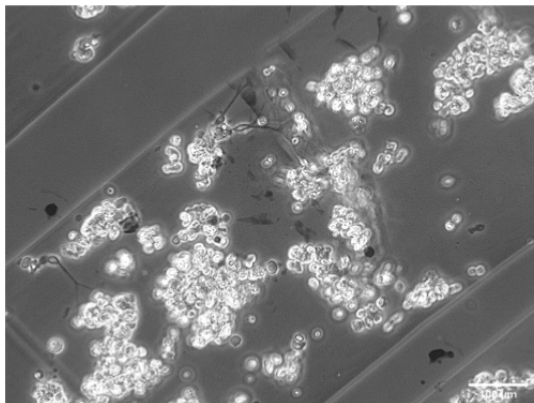

+ Alginate-lyase

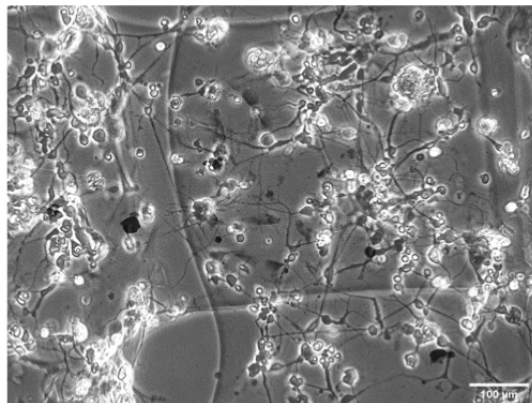

**Figure S3. Effects of the treatment with Alginate-lyase on the bioprinted specimen**

Photographs of the bioprinted specimen untreated or treated with the enzyme Alginate-lyase. Bioprinted samples were left untreated (left image) or incubated with Alginate-lyase 3 hours after the printing process (right image) and imaged at DPP1.

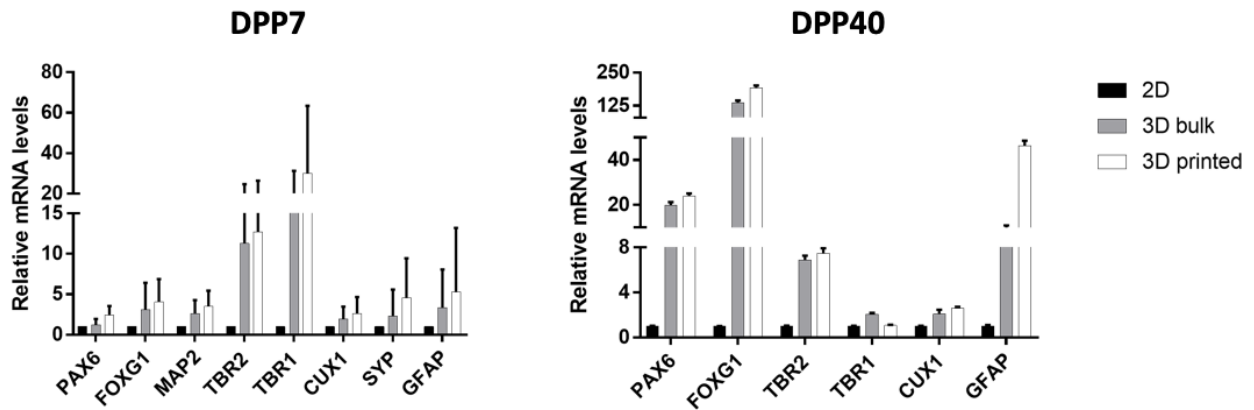

**Figure S4. Quantitative RT-PCR analysis**

Real-time qRT-PCR analysis of the indicated neuronal progenitors (PAX6, FOXG1, TBR2), neuronal (MAP2, SYP), cortical neurons (TBR1, CUX1) and astrocyte (GFAP) markers on the indicated samples at DPP7 (3 constructs) and DPP40 (1 construct).

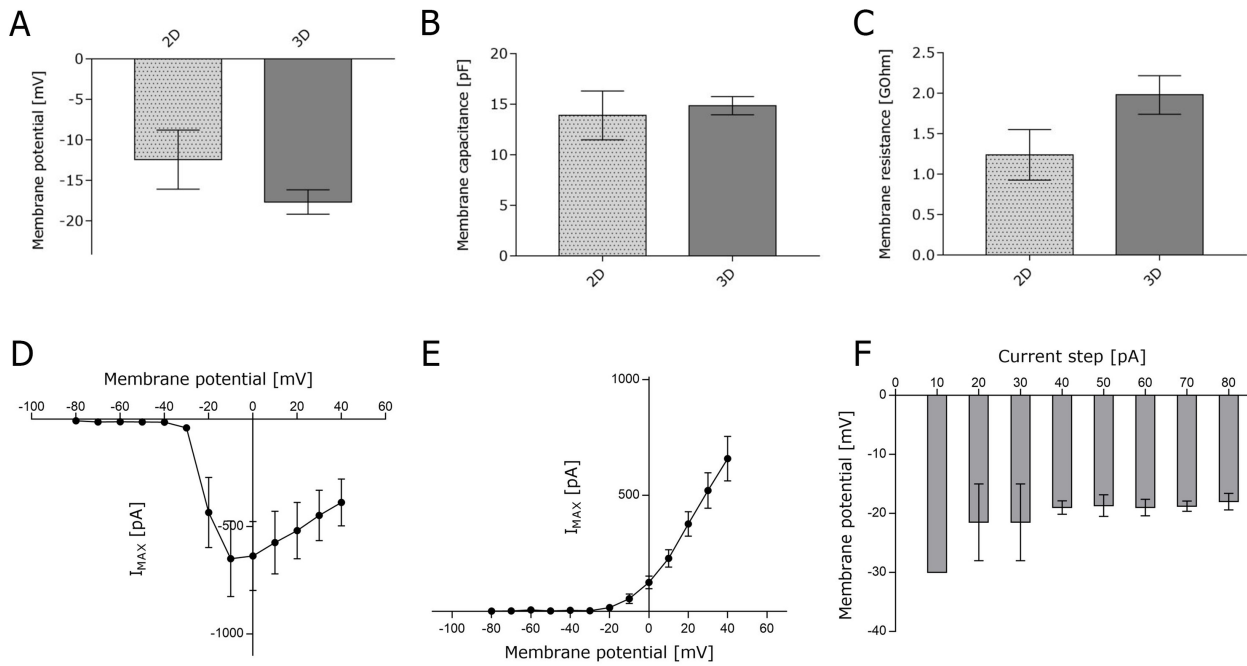

### Figure S5. Assessment of the 2D conventional cultures functionality

Bar charts representing: (A) membrane resting potential, (B) cell capacitance and (C) membrane resistance value comparison between 2D conventional cultures and 3D bioprinted constructs. No significant differences were observed between the two culture conditions. I/V plots showing: (D) Average trace of the large inward voltage-dependent  $\text{Na}^+$  currents and (E) average trace of the outward voltage-dependent  $\text{K}^+$  currents in iPSC-derived cortical neurons after 40 days in vitro in conventional 2D cultures. (F) Bar plot indicating the average threshold membrane potential for each current step required to elicit firing in iPSC-derived cortical neurons after 40 days in vitro in conventional 2D cultures. Data are presented as mean  $\pm$  s.e.m.

|          |                          |
|----------|--------------------------|
| ATP50 FW | ACTCGGGTTTGACCTACAGC     |
| ATP50 RV | GGTACTGAAGCATCGCACCT     |
| CUX1 FW  | AGTCCATGGAGTTTGCACCGTC   |
| CUX1 RV  | GAGCGGTTCTTCTCCAGCAACA   |
| FOXG1 FW | AGGAGGGCGAGAAGAAGAAC     |
| FOXG1 RV | TCACGAAGCACTTGTTGAGG     |
| GAPDH FW | GGAAGGTGAAGGTCGGAGTC     |
| GAPDH RV | TTACCAGAGTTAAAAGCAGC     |
| GFAP FW  | GATCAACTCACCGCCAACAG     |
| GFAP RV  | ATAGGCAGCCAGGTTGTTCT     |
| MAP2 FW  | TTCCTCCATTCTCCCTCCTCGG   |
| MAP2 RV  | TCTTCCCTGCTCTGCGAATTGG   |
| NANOG FW | CCAAATTCTCCTGCCAGTGAC    |
| NANOG RV | CACGTGGTTTCCAACAAGAAA    |
| PAX6 FW  | ATGTGTGAGTAAAATTCTGGGCA  |
| PAX6 RV  | GCTTACAACCTTCTGGAGTCGCTA |
| SYP FW   | CGGACATGGACGTGGTGAATCA   |
| SYP RV   | CACTCTCGGTCTTGTGGCACA    |
| TBR1 FW  | CAACGGAGCCTACAACAGCCTC   |
| TBR1 RV  | TGGTAGAACGGAGCTCCTTGGT   |
| TBR2 FW  | CTTCTTCCCGGAGCCCTTTGTC   |
| TBR2 RV  | TTCGCTCTGTTGGGGTGAAAGG   |
| TUJ1 FW  | CCCGGAACCATGGACAGTGT     |
| TUJ1 RV  | TGACCCTTGGCCCAGTTGTT     |

**Table S1. Primers used in this study**
